# Supplementary material for: Estimating deaths from foodborne disease in the UK for 11 key pathogens
Source: PubMed Central journal article supplement — BMJ Open Gastroenterol. 2020 Jun 24;7(1):e000377. doi: 10.1136/bmjgast-2020-000377 (PMC7319714; doi:10.1136/bmjgast-2020-000377), 2020-06-24
Supplement: bmjgast-2020-000377supp001.pdf [file bmjgast-2020-000377supp001.pdf]

**Supplementary data:**

Appendix: Model parameters

The parameter for each model are set out below:

**Model 1: Enhanced surveillance**

| Pathogen                | Number of deaths | Sources                                                                                                         | Year |
|-------------------------|------------------|-----------------------------------------------------------------------------------------------------------------|------|
| Bacteria                |                  |                                                                                                                 |      |
| <i>E. coli</i> O157     | 2                | Public Health England, Public Health Agency (Northern Ireland), Health Protection Scotland, Public Health Wales | 2018 |
| <i>L. monocytogenes</i> | 28               |                                                                                                                 |      |

**Model 2: Modelling using Outbreak data**

Model structure:  $D_p = L_p \times AR_p \times DP_p$  or  $D_p = CR_p \times Pop \times DP_p$

| Pathogen                | Confirmed laboratory cases |                                                                                                                 | Ascertainment ratio (AR <sub>p</sub> ) |                |                | Community rate (CR <sub>p</sub> ) |               |                | Proportion of cases that result in death (DP <sub>p</sub> ) |                   |
|-------------------------|----------------------------|-----------------------------------------------------------------------------------------------------------------|----------------------------------------|----------------|----------------|-----------------------------------|---------------|----------------|-------------------------------------------------------------|-------------------|
|                         | Cases (L <sub>p</sub> )    | Source                                                                                                          | Ratio                                  | 95% CrI        | Source         | Community rate                    | 95% CI        | Source         | Alpha <sup>1</sup>                                          | Beta <sup>1</sup> |
| Bacteria                |                            |                                                                                                                 |                                        |                |                |                                   |               |                |                                                             |                   |
| <i>Campylobacter</i>    | 69,636                     |                                                                                                                 | 9.3                                    | (6 - 14.4)     | IID2 study     |                                   |               |                | 1.92                                                        | 2723.32           |
| <i>C. perfringens</i>   |                            | Public Health England, Public Health Agency (Northern Ireland), Public Health Wales, Health Protection Scotland |                                        |                |                | 1.5                               | (0.5 - 3.9)   | IID2 extension | 1.22                                                        | 2955.71           |
| <i>E. coli</i> O157     |                            |                                                                                                                 | 7.4                                    | (0.5 to 105.4) |                |                                   |               |                | 6.24                                                        | 1509.10           |
| <i>L. monocytogenes</i> |                            |                                                                                                                 | 1                                      | NA             | IID2 extension |                                   |               |                | 10.17                                                       | 43.49             |
| <i>Salmonella</i>       | 10,124                     |                                                                                                                 | 4.7                                    | (1.2 - 18.2)   | IID2 study     |                                   |               |                | 9.73                                                        | 2015.12           |
| <i>Shigella</i>         | 2,812                      |                                                                                                                 | 2.55                                   | NA             | IID1 study     |                                   |               |                | 0.77                                                        | 174.31            |
| Protozoa                |                            |                                                                                                                 |                                        |                |                |                                   |               |                |                                                             |                   |
| <i>Cryptosporidium</i>  | 6,039                      |                                                                                                                 | 8.2                                    | (2.1 - 31.7)   | IID2 study     |                                   |               |                | 0.00                                                        | 0.00              |
| <i>Giardia</i>          | 6,216                      |                                                                                                                 | 14                                     | (4 - 49)       | IID2 study     |                                   |               |                | 0.00                                                        | 0.00              |
| Viruses                 |                            |                                                                                                                 |                                        |                |                |                                   |               |                |                                                             |                   |
| Adenovirus              |                            |                                                                                                                 |                                        |                |                | 10.2                              | (6.8 - 15.4)  | IID2 extension | 0.00                                                        | 0.00              |
| Norovirus               |                            |                                                                                                                 |                                        |                |                | 47.0                              | (39.1 - 56.5) | IID2 extension | 11.88                                                       | 9945.04           |
| Rotavirus               | 2,651                      |                                                                                                                 | 42.9                                   | (29.5 - 62.4)  | IID2 study     |                                   |               |                | 0.00                                                        | 0.00              |

[1]

Note:

<sup>1</sup> Modelled using Public Health England outbreak data for 2001 to 2016

Other parameter used: Pop = 66,435,600. Source: ONS mid-year population estimate

**Model 3: Death certificate data plus expert assessments**

Model structure:  $D_p = (DM_p + DPT_p) \times POPADJ_{EW}$

ONS mortality data was used to produce  $DM_p$  and  $DPT_p$  using a Monte Carlo simulation model and bootstrapping respectively. This underlying data was purchased under a data sharing agreement and cannot be shared

$POPADJ_{EW} = 1.17$ . Based on ONS mid-year population estimates: 2018 UK population 66,435,600, 2018 England & Wales population 5,911,800.

**Model 4: Hospital Episode Statistics – Proportion of discharges due to death**

Model structure:  $D_p = L_p \times AR_p \times HP_p \times HES_p \times NHU_p$  or  $D_p = CR_p \times Pop \times HP_p \times HES_p \times NHU_p$

| Pathogen                | Proportion of illness that results in hospital admissions |                   | Death rate         |                   | Uplifting factor for deaths that don't occur in hospital |                   |
|-------------------------|-----------------------------------------------------------|-------------------|--------------------|-------------------|----------------------------------------------------------|-------------------|
|                         | Alpha <sup>1</sup>                                        | Beta <sup>1</sup> | Alpha <sup>2</sup> | Beta <sup>2</sup> | Alpha <sup>3</sup>                                       | Beta <sup>3</sup> |
| Bacteria                |                                                           |                   |                    |                   |                                                          |                   |
| <i>Campylobacter</i>    | 21.33                                                     | 1751.97           | 218.31             | 38784.37          | 0.92                                                     | 51.43             |
| <i>C. perfringens</i>   | 6.96                                                      | 1465.70           | 5.57               | 22.20             | 0.69                                                     | 0.87              |
| <i>E.coli</i> O157      | 56.63                                                     | 207.67            | 167.97             | 5674.84           | 0.94                                                     | 13.60             |
| <i>L. monocytogenes</i> | 3.04                                                      | 1.23              | 149.60             | 786.42            | 0.95                                                     | 140.40            |
| <i>Salmonella</i>       | 69.34                                                     | 967.95            | 192.74             | 13246.27          | 0.90                                                     | 137.74            |
| <i>Shigella</i>         | 2.76                                                      | 120.59            | 4.55               | 1642.81           | 1.00                                                     | 13.60             |
| Protozoa                |                                                           |                   |                    |                   |                                                          |                   |
| <i>Cryptosporidium</i>  | 21.01                                                     | 751.60            | 14.20              | 1483.51           | 0.90                                                     | 7.04              |
| <i>Giardia</i>          | 1.10                                                      | 338.82            | 9.72               | 3282.83           | 0.76                                                     | 1.70              |
| Viruses                 |                                                           |                   |                    |                   |                                                          |                   |
| Adenovirus              | 9.91                                                      | 596.51            | 7.30               | 2044.17           | 0.78                                                     | 13.92             |
| Norovirus               | 28.71                                                     | 4989.42           | 36.25              | 1104.76           | 0.82                                                     | 17.98             |
| Rotavirus               | 9.9                                                       | 596.5             | 8.66               | 7571.78           | 0.78                                                     | 13.92             |

## Notes:

<sup>1</sup> Modelled using Public Health England outbreak data for 2001 to 2016. Coverage England

<sup>2</sup> Modelled using Health and Social Care Information centre hospital discharge data for 2000-01 to 2017-18. Coverage England

<sup>3</sup> Modelled using ONS mortality data from 2001-2012. Coverage England & Wales

**Foodborne proportion**

| Pathogen                | Proportion of cases attributable to food |        |
|-------------------------|------------------------------------------|--------|
|                         | Alpha                                    | Beta   |
| Bacteria                |                                          |        |
| <i>Campylobacter</i>    | 6.12                                     | 6.55   |
| <i>C. perfringens</i>   | 22.68                                    | 3.97   |
| <i>E.coli</i> O157      | 14.13                                    | 12.58  |
| <i>L. monocytogenes</i> | 43.47                                    | 3.03   |
| <i>Salmonella</i>       | 116.95                                   | 12.51  |
| <i>Shigella</i>         | 1.22                                     | 3.40   |
| Protozoa                |                                          |        |
| <i>Cryptosporidium</i>  | 4.27                                     | 63.48  |
| <i>Giardia</i>          | 3.19                                     | 11.51  |
| Viruses                 |                                          |        |
| Adenovirus              | 3.40                                     | 162.46 |
| Rotavirus               | 3.40                                     | 162.46 |

Modelled using Public Health England outbreak data for 2001 to 2008. These are very similar to those used in the IID2 extension. The analysis was model were recreated for this study so numbers are slightly different

For norovirus the proportion attributable to food was based an the estimates of 383,182 foodborne norovirus cases in 2018 divided by all norovirus cases using parameters  $CR_p \times Pop$  given in model 2.[1]
